# Supplementary material for: Expression of Selected miRNAs in Normal and Cancer-Associated Fibroblasts and in BxPc3 and MIA PaCa-2 Cell Lines of Pancreatic Ductal Adenocarcinoma
Source: MDPI journal article supplement (doi:10.3390/ijms24043617), 2023-02-10
Supplement: s1 [file s1]

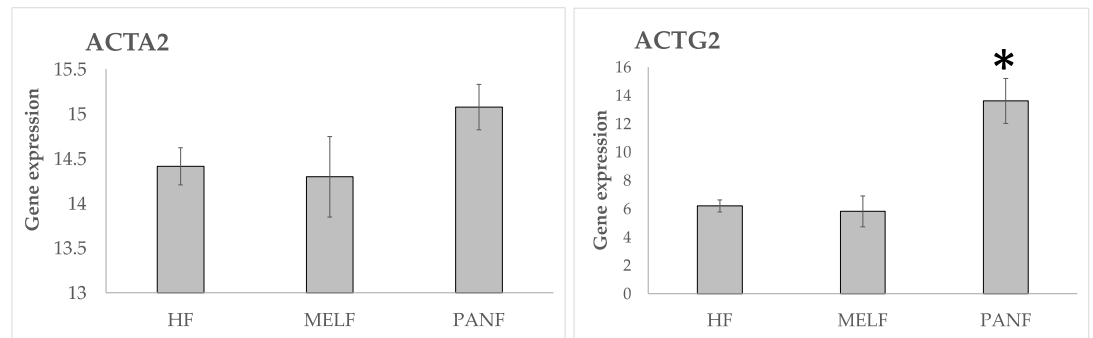

**Supplementary Figure S1.** While expression of *ACTA2* gene encoding  $\alpha$ -smooth muscle actin was not significantly different in PANF in comparison to HF, the activity of *ACTG2* gene encoding intestinal smooth  $\gamma$ -muscle actin was significantly higher in PANF. Statistically significant differences between HF and other cell lines at adjusted p-value < 0.05 are marked by the asterisk.

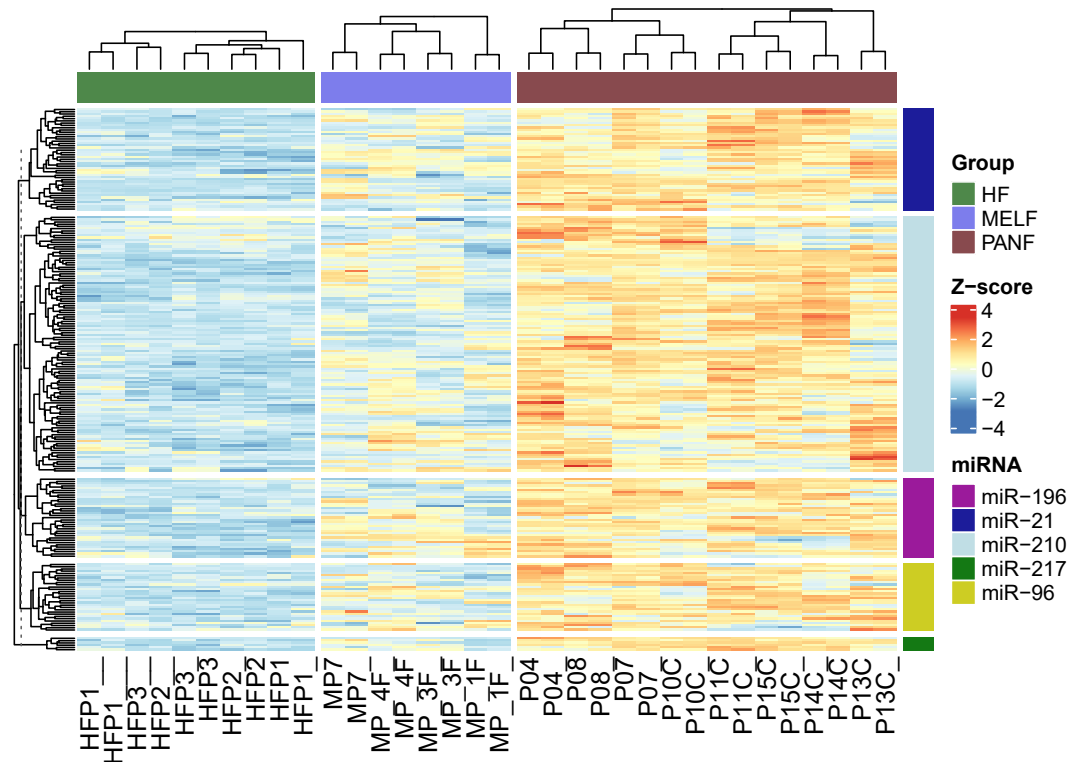

**Supplementary Figure S2.** Gene expression changes at the mRNA level for targets of miR-21, miR-210, miR-217, miR-96, and miR-196. For each miRNA, its experimentally validated targets were downloaded from the Tarbase v8 (<http://microrna.gr/tarbase>) database. The changes in gene expression of the targets that were also differentially expressed in the comparison of PANF and DF are displayed in the heatmap.

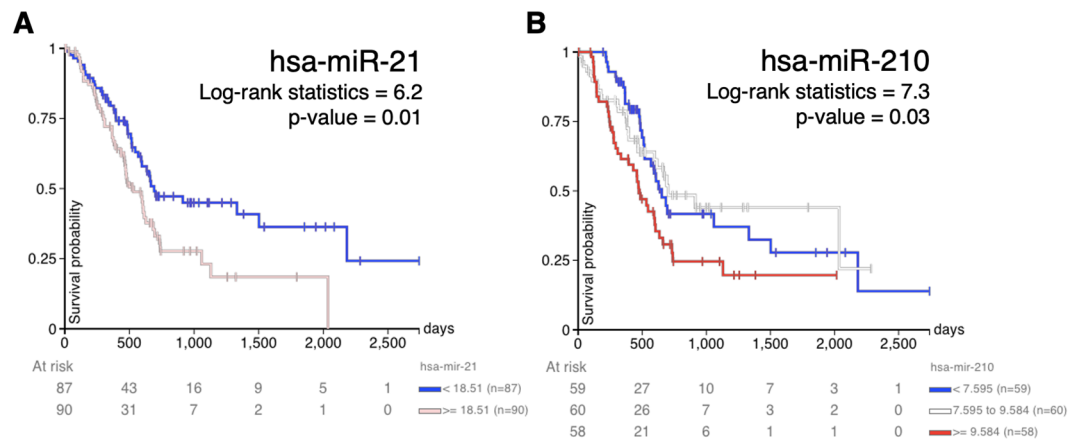

**Supplementary Figure S3.** Expression of miR-21 and miR-210 correlates with patient survival. Overall survival of the patients in the TCGA PAAD dataset depends on the expression of miR-21 and miR-210 in primary tumors. The data, Kaplan-Meier plots, and statistical tests were provided by the XENA portal (<https://xenabrowser.net>).

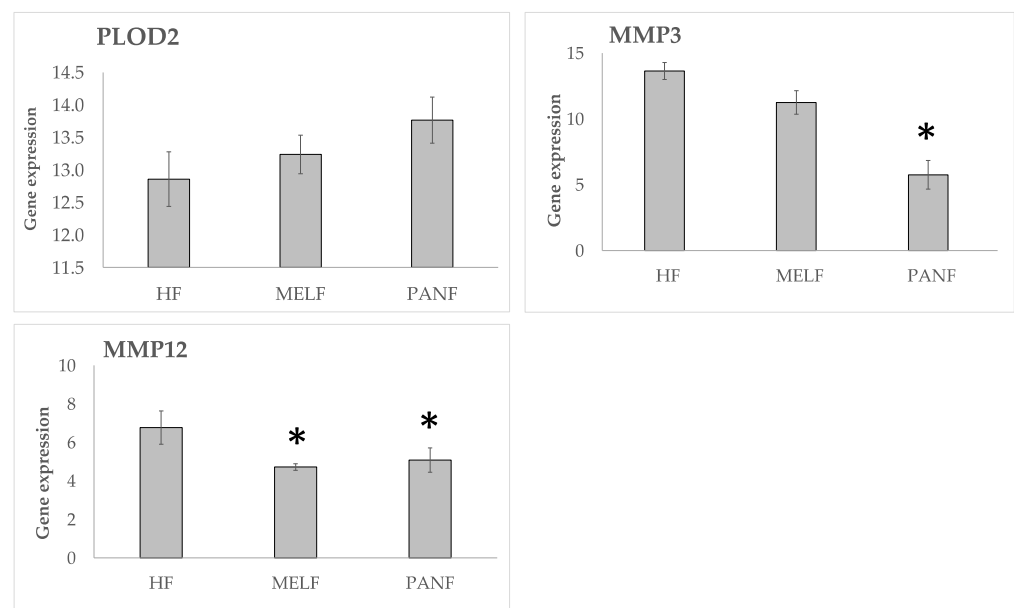

**Supplementary Figure S4.** Comparison of gene activity of PLOD2, MMP3, and MMP12 in normal fibroblasts and CAFs from the melanoma (MELF) and PDAC (PANF). Asterisks mark statistically significant differences between HF and PANF. Although the *PLOD2* gene is only insignificantly upregulated in PANF, it can affect crosslinking of collagen fibres and thus exert strong biological activity. Taken together with the downregulation of *MMP3/12* genes, which can reduce the remodelling of ECM, this data supports the desmoplastic character of PDAC stroma.

**Supplementary Table S1.** MicroRNAs log2 relative expression intensities in human cell lines compared to the tissue of the normal pancreas

| Cell line  | miRNAs fold change (Mean±SD) |                         |                         |                         |                          |
|------------|------------------------------|-------------------------|-------------------------|-------------------------|--------------------------|
|            | miR-21                       | miR-96                  | miR-196a                | miR-210                 | miR-217                  |
| HDF        | 2.41±0.56*<br>FDR=0.004      | 0.42±0.30<br>FDR=0.004  | -0.63±0.18<br>FDR=0.005 | 1.36±0.24*<br>FDR=0.03  | -0.60±0.26<br>FDR=0.004  |
| HF.        | 3.99±0.27*<br>FDR<0.001      | -0.84±0.40<br>FDR<0.001 | -0.17±0.10<br>FDR<0.001 | 1.66±0.17*<br>FDR<0.001 | -3.51±0.33*<br>FDR<0.001 |
| PANF       | 3.32±0.18*<br>FDR=0.03       | -1.11±0.22*<br>FDR=0.01 | 0.34±0.08<br>FDR=0.03   | 3.90±0.06*<br>FDR=0.03  | -5.85±0.80*<br>FDR=0.03  |
| BxPc3      | 2.13±0.38*<br>FDR=0.03       | 0.73±0.40<br>FDR=0.03   | 1.20±0.18*<br>FDR=0.03  | 1.69±0.24*<br>FDR=0.03  | -4.85±0.80*<br>FDR=0.03  |
| MIA PaCa-2 | 3.04±0.48*<br>FDR=0.003      | 1.27±0.37*<br>FDR=0.003 | 0.25±0.37<br>FDR=0.4    | 4.51±0.17*<br>FDR=0.003 | -4.10±0.25*<br>FDR=0.003 |

\* Minimally 2-fold higher or lower than in lysate from the normal pancreas at adjusted p-value FDR < 0.05.

**Supplementary Table S2.** Most significantly deregulated genes ( $|\log_2FC| > 1$ , adjusted p-value < 0.05) for comparison PANF vs dermal fibroblasts

| Most significant genes |          |                                                |                     |                  |
|------------------------|----------|------------------------------------------------|---------------------|------------------|
| Entrez ID              | Symbol   | Gene name                                      | Log <sub>2</sub> FC | Adjusted p-value |
| 8912                   | CACNA1H  | calcium voltage-gated channel subunit alpha1 H | 4.8                 | <0.0001          |
| 1004                   | CDH6     | cadherin 6                                     | 4.18                | <0.0001          |
| 9023                   | CH25H    | cholesterol 25-hydroxylase                     | -5.86               | <0.0001          |
| 160364                 | CLEC12A  | C-type lectin domain family 12 member A        | -3.53               | <0.0001          |
| 22837                  | COBLL1   | cordon-bleu WH2 repeat protein like 1          | 1.98                | <0.0001          |
| 81035                  | COLEC12  | collectin subfamily member 12                  | -6.59               | <0.0001          |
| 1805                   | DPT      | dermatopontin                                  | -5.26               | <0.0001          |
| 2018                   | EMX2     | empty spiracles homeobox 2                     | -3.98               | <0.0001          |
| 2019                   | EN1      | engrailed homeobox 1                           | -2.66               | <0.0001          |
| 80144                  | FRAS1    | Fraser extracellular matrix complex subunit 1  | -3.8                | <0.0001          |
| 8322                   | FZD4     | frizzled class receptor 4                      | 2.68                | <0.0001          |
| 3206                   | HOXA10   | homeobox A10                                   | -3.29               | <0.0001          |
| 3223                   | HOXC6    | homeobox C6                                    | -3.3                | <0.0001          |
| 3234                   | HOXD8    | homeobox D8                                    | -2.12               | <0.0001          |
| 3490                   | IGFBP7   | insulin like growth factor binding protein 7   | 2.88                | <0.0001          |
| 10265                  | IRX5     | iroquois homeobox 5                            | -4.42               | <0.0001          |
| 3875                   | KRT18    | keratin 18                                     | 6.68                | <0.0001          |
| 284085                 | KRT18P55 | keratin 18 pseudogene 55                       | 6.59                | <0.0001          |

|       |          |                                              |       |         |
|-------|----------|----------------------------------------------|-------|---------|
| 54596 | L1TD1    | LINE1 type transposase domain containing 1   | -1.74 | <0.0001 |
| 4314  | MMP3     | matrix metalloproteinase 3                   | -6.92 | <0.0001 |
| 4879  | NPPB     | natriuretic peptide B                        | 4.72  | <0.0001 |
| 5099  | PCDH7    | protocadherin 7                              | 4.18  | <0.0001 |
| 5308  | PITX2    | paired like homeodomain 2                    | -2.28 | <0.0001 |
| 51316 | PLAC8    | placenta specific 8                          | -2.66 | <0.0001 |
| 6275  | S100A4   | S100 calcium binding protein A4              | -3.95 | <0.0001 |
| 6335  | SCN9A    | sodium voltage-gated channel alpha subunit 9 | 5.24  | <0.0001 |
| 23231 | SEL1L3   | SEL1L family member 3                        | 3.31  | <0.0001 |
| 58516 | SINHCAF  | SIN3-HDAC complex associated factor          | 1.85  | <0.0001 |
| 5552  | SRGN     | serglycin                                    | 3.88  | <0.0001 |
| 10617 | STAMBP   | STAM binding protein                         | 1.12  | <0.0001 |
| 6913  | TBX15    | T-box 15                                     | -4.72 | <0.0001 |
| 6943  | TCF21    | transcription factor 21                      | 3.67  | <0.0001 |
| 55504 | TNFRSF19 | TNF receptor superfamily member 19           | -2.24 | <0.0001 |
| 7291  | TWIST1   | twist family bHLH transcription factor 1     | -2.84 | <0.0001 |
| 79971 | WLS      | wntless Wnt ligand secretion mediator        | 3.75  | <0.0001 |

**Supplementary Table S3.** The most significant GO terms for comparison PANF vs dermal fibroblasts, with added hypoxia and extracellular matrix organisation.

| 50 most significant GO terms |            |                                    |               |         |            |              |
|------------------------------|------------|------------------------------------|---------------|---------|------------|--------------|
| Rank                         | Accession  | GO term                            | Category size | Overlap | Odds ratio | GSEA p-value |
| 1                            | GO:0048856 | anatomical structure development   | 5541          | 500     | 2.327      | <0.0001      |
| 2                            | GO:0007275 | multicellular organism development | 5073          | 470     | 2.339      | <0.0001      |
| 3                            | GO:0032502 | developmental process              | 5955          | 524     | 2.303      | <0.0001      |
| 4                            | GO:0009653 | anatomical structure morphogenesis | 2467          | 285     | 2.635      | <0.0001      |
| 5                            | GO:0048731 | system development                 | 4522          | 430     | 2.325      | <0.0001      |
| 6                            | GO:0048513 | animal organ development           | 3295          | 332     | 2.291      | <0.0001      |
| 7                            | GO:0009888 | tissue development                 | 1892          | 226     | 2.61       | <0.0001      |
| 8                            | GO:0009887 | animal organ morphogenesis         | 980           | 147     | 3.245      | <0.0001      |
| 9                            | GO:0072359 | circulatory system development     | 979           | 146     | 3.219      | <0.0001      |
| 10                           | GO:0032501 | multicellular organismal process   | 7116          | 566     | 2.036      | <0.0001      |
| 11                           | GO:0035295 | tube development                   | 571           | 96      | 3.579      | <0.0001      |
| 12                           | GO:0016477 | cell migration                     | 1293          | 161     | 2.608      | <0.0001      |
| 13                           | GO:0072358 | cardiovascular system development  | 660           | 103     | 3.284      | <0.0001      |
| 14                           | GO:0001944 | vasculature development            | 653           | 102     | 3.285      | <0.0001      |
| 15                           | GO:0040011 | locomotion                         | 1661          | 186     | 2.331      | <0.0001      |
| 16                           | GO:0048870 | cell motility                      | 1430          | 167     | 2.421      | <0.0001      |
| 17                           | GO:0051674 | localisation of cell               | 1430          | 167     | 2.421      | <0.0001      |
| 18                           | GO:0001568 | blood vessel development           | 624           | 97      | 3.252      | <0.0001      |
| 19                           | GO:0008283 | cell proliferation                 | 1993          | 210     | 2.199      | <0.0001      |
| 20                           | GO:0048729 | tissue morphogenesis               | 620           | 96      | 3.234      | <0.0001      |
| 28                           | GO:0030198 | extracellular matrix organisation  | 330           | 64      | 4.164      | <0.0001      |
| 288                          | GO:0001666 | response to hypoxia                | 336           | 41      | 2.34       | <0.0001      |

**Supplementary Table S4.** Significantly deregulated genes ( $|\log_2FC| > 1$ , adjusted p-value  $< 0.05$ ) associated with hypoxia for comparison PANF vs dermal fibroblast

| Genes associated with hypoxia |         |                                                                                 |                     |                  |
|-------------------------------|---------|---------------------------------------------------------------------------------|---------------------|------------------|
| Entrez ID                     | Symbol  | Gene description                                                                | Log <sub>2</sub> FC | Adjusted p-value |
| 5244                          | ABCB4   | ATP binding cassette subfamily B member 4                                       | -1.04               | 0.005            |
| 94                            | ACVRL1  | activin A receptor like type 1                                                  | -1.11               | 0.04             |
| 100                           | ADA     | adenosine deaminase                                                             | -1.07               | 0.0002           |
| 133                           | ADM     | Adrenomedullin                                                                  | -2.25               | <0.0001          |
| 51129                         | ANGPTL4 | angiopoietin like 4                                                             | 2.18                | 0.05             |
| 27063                         | ANKRD1  | ankyrin repeat domain 1                                                         | 2.9                 | 0.0004           |
| 481                           | ATP1B1  | ATPase Na <sup>+</sup> /K <sup>+</sup> transporting subunit beta 1              | -1.23               | 0.0003           |
| 650                           | BMP2    | bone morphogenetic protein 2                                                    | 1.27                | 0.003            |
| 664                           | BNIP3   | BCL2 interacting protein 3                                                      | 1.09                | 0.0002           |
| 847                           | CAT     | catalase                                                                        | -1.21               | <0.0001          |
| 857                           | CAV1    | caveolin 1                                                                      | -1.32               | 0.001            |
| 100133941                     | CD24    | CD24 molecule                                                                   | -2.82               | 0.02             |
| 10370                         | CITED2  | Cbp/p300 interacting transactivator with Glu/Asp rich carboxy-terminal domain 2 | -1.07               | 0.009            |
| 6387                          | CXCL12  | C-X-C motif chemokine ligand 12                                                 | -4.52               | <0.0001          |
| 114757                        | CYGB    | cytoglobin                                                                      | 2.81                | 0.001            |
| 1977                          | EIF4E   | eukaryotic translation initiation factor 4E                                     | 1.19                | 0.0002           |
| 2026                          | ENO2    | enolase 2                                                                       | 1.31                | 0.01             |
| 2034                          | EPAS1   | endothelial PAS domain protein 1                                                | -1.07               | 0.009            |
| 26355                         | FAM162A | family with sequence similarity 162 member A                                    | 1.38                | 0.007            |
| 56776                         | FMN2    | formin 2                                                                        | -1.43               | 0.0004           |
| 2627                          | GATA6   | GATA binding protein 6                                                          | 1.44                | <0.0001          |
| 3091                          | HIF1A   | hypoxia inducible factor 1 alpha subunit                                        | 0.69                | 0.09             |
| 29923                         | HILPDA  | hypoxia inducible lipid droplet associated                                      | 0.8                 | 0.01             |
| 3162                          | HMOX1   | heme oxygenase 1                                                                | -1.7                | 0.006            |
| 3569                          | IL6     | interleukin 6                                                                   | 2                   | 0.09             |
| 3708                          | ITPR1   | inositol 1,4,5-trisphosphate receptor type 1                                    | 2.04                | <0.0001          |
| 3751                          | KCND2   | potassium voltage-gated channel subfamily D member 2                            | 1.2                 | 0.02             |
| 3776                          | KCNK2   | potassium two pore domain channel subfamily K member 2                          | -1.51               | 0.001            |
| 79625                         | NDNF    | neuron derived neurotrophic factor                                              | -4.29               | <0.0001          |
| 4846                          | NOS3    | nitric oxide synthase 3                                                         | 1.11                | 0.03             |
| 50507                         | NOX4    | NADPH oxidase 4                                                                 | 2.68                | <0.0001          |
| 4879                          | NPPB    | natriuretic peptide B                                                           | 4.72                | <0.0001          |
| 5228                          | PGF     | placental growth factor                                                         | -1.42               | 0.03             |
| 5295                          | PIK3R1  | phosphoinositide-3-kinase regulatory subunit 1                                  | -1.07               | 0.004            |

|        |        |                                                   |       |         |
|--------|--------|---------------------------------------------------|-------|---------|
| 5327   | PLAT   | plasminogen activator, tissue type                | 3.35  | <0.0001 |
| 5328   | PLAU   | plasminogen activator, urokinase                  | 2.65  | 0.003   |
| 5352   | PLOD2  | procollagen-lysine,2-oxoglutarate 5-dioxygenase 2 | 1.35  | 0.008   |
| 10631  | POSTN  | periostin                                         | 3.33  | 0.0005  |
| 5664   | PSEN2  | presenilin 2                                      | 1.36  | 0.0007  |
| 5743   | PTGS2  | prostaglandin-endoperoxide synthase 2             | 2.5   | 0.002   |
| 6095   | RORA   | RAR related orphan receptor A                     | 1.19  | 0.06    |
| 6513   | SLC2A1 | solute carrier family 2 member 1                  | 1.68  | <0.0001 |
| 7010   | TEK    | TEK receptor tyrosine kinase                      | 3.87  | <0.0001 |
| 7042   | TGFB2  | transforming growth factor beta 2                 | 2.72  | <0.0001 |
| 7049   | TGFBR3 | transforming growth factor beta receptor 3        | -2.89 | <0.0001 |
| 7057   | THBS1  | thrombospondin 1                                  | -1.21 | 0.0002  |
| 7291   | TWIST1 | twist family bHLH transcription factor 1          | -2.84 | <0.0001 |
| 7422   | VEGFA  | vascular endothelial growth factor A              | 2.25  | <0.0001 |
| 126374 | WTIP   | WT1 interacting protein                           | -1.08 | 0.005   |

**Supplementary Table S5.** Significantly deregulated genes ( $|\log_2FC| > 1$ , adjusted p-value  $< 0.05$ ) associated with extracellular matrix for comparison PANF vs dermal fibroblast

| Genes associated with extracellular matrix organisation |            |                                                          |                     |                  |
|---------------------------------------------------------|------------|----------------------------------------------------------|---------------------|------------------|
| Entrez ID                                               | Symbol     | Gene description                                         | Log <sub>2</sub> FC | Adjusted p-value |
| 8728                                                    | ADAM19     | ADAM metallopeptidase domain 19                          | 2.51                | <0.0001          |
| 11096                                                   | ADAMTS5    | ADAM metallopeptidase with thrombospondin type 1 motif 5 | -1.85               | 0.03             |
| 54507                                                   | ADAMTSL4   | ADAMTS like 4                                            | -1.19               | 0.07             |
| 84168                                                   | ANTXR1     | anthrax toxin receptor 1                                 | -1.24               | 0.0008           |
| 302                                                     | ANXA2      | annexin A2                                               | -1.02               | 0.02             |
| 146206                                                  | CARMIL2    | capping protein regulator and myosin 1 linker 2          | -1.16               | 0.003            |
| 1301                                                    | COL11A1    | collagen type XI alpha 1 chain                           | 5.34                | <0.0001          |
| 80781                                                   | COL18A1    | collagen type XVIII alpha 1 chain                        | -1.85               | 0.0007           |
| 1282                                                    | COL4A1     | collagen type IV alpha 1 chain                           | 2.69                | <0.0001          |
| 1284                                                    | COL4A2     | collagen type IV alpha 2 chain                           | 2.81                | <0.0001          |
| 1295                                                    | COL8A1     | collagen type VIII alpha 1 chain                         | -1.45               | 0.07             |
| 1296                                                    | COL8A2     | collagen type VIII alpha 2 chain                         | -1.28               | 0.01             |
| 1311                                                    | COMP       | cartilage oligomeric matrix protein                      | -4.87               | <0.0001          |
| 83716                                                   | CRISPLD2   | cysteine rich secretory protein LCCL domain containing 2 | -2.06               | 0.002            |
| 55790                                                   | CSGALNACT1 | chondroitin sulfate N-acetylgalactosaminyltransferase 1  | 2.2                 | <0.0001          |
| 1513                                                    | CTSK       | cathepsin K                                              | -2.66               | <0.0001          |
| 1514                                                    | CTSL       | cathepsin L                                              | -1.36               | 0.002            |
| 1634                                                    | DCN        | decorin                                                  | -1.33               | 0.07             |
| 1805                                                    | DPT        | dermatopontin                                            | -5.26               | <0.0001          |
| 133584                                                  | EGFLAM     | EGF like, fibronectin type III and laminin G domains     | 1.09                | 0.03             |
| 2006                                                    | ELN        | elastin                                                  | -2.93               | 0.005            |
| 2192                                                    | FBLN1      | fibulin 1                                                | -2.91               | 0.0002           |
| 2199                                                    | FBLN2      | fibulin 2                                                | -2.2                | 0.002            |
| 10516                                                   | FBLN5      | fibulin 5                                                | -1.15               | 0.005            |
| 23768                                                   | FLRT2      | fibronectin leucine rich transmembrane protein 2         | -2.14               | 0.0009           |
| 2296                                                    | FOXC1      | forkhead box C1                                          | -1.21               | 0.05             |
| 2303                                                    | FOXC2      | forkhead box C2                                          | 2.54                | <0.0001          |
| 2294                                                    | FOXF1      | forkhead box F1                                          | 2.12                | 0.005            |
| 2295                                                    | FOXF2      | forkhead box F2                                          | -1.03               | 0.002            |
| 3038                                                    | HAS3       | hyaluronan synthase 3                                    | 1.85                | 0.0004           |
| 5654                                                    | HTRA1      | HtrA serine peptidase 1                                  | -1.47               | <0.0001          |
| 3672                                                    | ITGA1      | integrin subunit alpha 1                                 | 1.17                | 0.01             |
| 3678                                                    | ITGA5      | integrin subunit alpha 5                                 | 1.48                | <0.0001          |
| 3689                                                    | ITGB2      | integrin subunit beta 2                                  | -1.41               | 0.02             |



|        |        |                                                             |       |         |
|--------|--------|-------------------------------------------------------------|-------|---------|
| 284217 | LAMA1  | laminin subunit alpha 1                                     | 2.3   | <0.0001 |
| 3910   | LAMA4  | laminin subunit alpha 4                                     | -1.47 | 0.06    |
| 3915   | LAMC1  | laminin subunit gamma 1                                     | 1.01  | 0.0003  |
| 3918   | LAMC2  | laminin subunit gamma 2                                     | 2.52  | 0.0001  |
| 4016   | LOXL1  | lysyl oxidase like 1                                        | -1.31 | 0.004   |
| 4060   | LUM    | lumican                                                     | -1.16 | 0.04    |
| 8076   | MFAP5  | microfibril associated protein 5                            | 3.16  | <0.0001 |
| 4320   | MMP11  | matrix metalloproteinase 11                                 | 1.12  | 0.02    |
| 4321   | MMP12  | matrix metalloproteinase 12                                 | -2.85 | <0.0001 |
| 4314   | MMP3   | matrix metalloproteinase 3                                  | -6.92 | <0.0001 |
| 4629   | MYH11  | myosin heavy chain 11                                       | 2.93  | 0.01    |
| 79625  | NDNF   | neuron derived neurotrophic factor                          | -4.29 | <0.0001 |
| 4811   | NID1   | nidogen 1                                                   | -1.15 | 0.006   |
| 22795  | NID2   | nidogen 2                                                   | 1.29  | 0.02    |
| 10609  | P3H4   | prolyl 3-hydroxylase family member 4 (non-enzymatic)        | 1.1   | 0.0006  |
| 5154   | PDGFA  | platelet derived growth factor subunit A                    | 1.6   | 0.001   |
| 5156   | PDGFRA | platelet derived growth factor receptor alpha               | -1.06 | 0.0006  |
| 10631  | POSTN  | periostin                                                   | 3.33  | 0.0005  |
| 8434   | RECK   | reversion inducing cysteine rich protein with kazal motifs  | -1.12 | 0.005   |
| 222663 | SCUBE3 | signal peptide, CUB domain and EGF like domain containing 3 | 1.87  | 0.003   |
| 642658 | SCX    | scleraxis bHLH transcription factor                         | -2.11 | 0.007   |
| 6423   | SFRP2  | secreted frizzled related protein 2                         | -7.15 | <0.0001 |
| 6662   | SOX9   | SRY-box 9                                                   | -1.4  | 0.08    |
| 10653  | SPINT2 | serine peptidase inhibitor, Kunitz type 2                   | 3.37  | <0.0001 |
| 6696   | SPP1   | secreted phosphoprotein 1                                   | 1.25  | 0.0001  |
| 7042   | TGFB2  | transforming growth factor beta 2                           | 2.72  | <0.0001 |
| 7057   | THBS1  | thrombospondin 1                                            | -1.21 | 0.0002  |
| 79875  | THSD4  | thrombospondin type 1 domain containing 4                   | 1.02  | 0.0001  |
| 3371   | TNC    | tenascin C                                                  | -2.49 | 0.0001  |
| 5212   | VIT    | vitron                                                      | -3.41 | <0.0001 |

**Supplementary Table S6.** Stem-loop primers for the miRNAs

| <b>miRNA name</b>               | <b>Stem-loop Primer sequence</b>                         |
|---------------------------------|----------------------------------------------------------|
| <b>miR-39</b> <i>C. elegans</i> | GTCGTATCCAGTGCAGGGTCCGAGGTATTCGCACTGGATACGACTATTAC       |
| <b>miR-21</b>                   | GTCGTATCCAGTGCAGGGTCCGAGGTATTCGCACTGGATACGACTCAACA       |
| <b>miR-96</b>                   | GTCGTATCCAGTGCAGGGTCCGAGGTATTCGCACTGGATACGACAGCAAAAATGTG |
| <b>miR-196a</b>                 | GTCGTATCCAGTGCAGGGTCCGAGGTATTCGCACTGGATACGACCCCAACAACATG |
| <b>miR-210</b>                  | GTCGTATCCAGTGCAGGGTCCGAGGTATTCGCACTGGATACGACTCAGCCGCTGTC |
| <b>miR-217</b>                  | GTCGTATCCAGTGCAGGGTCCGAGGTATTCGCACTGGATACGACTCCAATCAGTTC |

**Supplementary Table S7.** Real-time qPCR primers

| <b>Primer name</b>       | <b>Primer sequence</b>   |
|--------------------------|--------------------------|
| Universal primer         | ATCCAGTGCAGGGTCCGAGG     |
| miR-39 <i>C. elegans</i> | GCGGCGGAGCTGATTTCTGTCTTG |
| miR-21                   | GCGGCGGTAGCTTATCAGACTG   |
| miR-96                   | GCGGCGGTTTGGCACTAGCAC    |
| miR-196a                 | GCGGCGGTAGGTAGTTTCATGTTG |
| miR-210                  | GCGGCGGCTGTGCGTGTGACAG   |
| miR-217                  | GCGGCGGTACTGCATCAGGAAC   |
